# Supplementary material for: The intrinsic quantum anomalous Hall effect in TaPdXTe (X = S, Se) monolayers
Source: Royal Society of Chemistry journal article supplement (doi:10.1039/d4tc02809k), 2024-01-01
Supplement: d4tc02809k1.pdf [file d4tc02809k1.pdf]

## Supplementary Information

### Intrinsic Quantum Anomalous Hall Effect in TaPdXTe (X = S, Se) monolayer

Haofeng Wei<sup>a</sup>, Yanzhao Wu<sup>a</sup>, Junwei Tong<sup>b</sup>, Li Deng<sup>a</sup>, Xiang Yin<sup>a</sup>, Zhijun Zhang<sup>c</sup>, and Xianmin Zhang<sup>a\*</sup>

<sup>a</sup>Key Laboratory for Anisotropy and Texture of Materials (Ministry of Education), School of Material Science and Engineering, Northeastern University, Shenyang, 110819, China

<sup>b</sup>Department of Physics, Freie Universität Berlin, Berlin, 14195, Germany

<sup>c</sup>Liaoning Institute of Science and Technology, Benxi 117004, China

In this study, the first-principles calculations based on Density Functional Theory (DFT) are performed using the Vienna ab initio simulation package (VASP)<sup>[1, 2]</sup>. The interaction between electrons and ions is described using the projector-augmented wave (PAW) method<sup>[3, 4]</sup>. The generalized gradient approximation (GGA) with the Perdew-Burke-Ernzerhof (PBE) formalism is used to describe the exchange-correlation interaction<sup>[5]</sup>. A  $11 \times 11 \times 1$  Monkhorst-Pack k-point meshes is used to sample the Brillouin zone<sup>[6]</sup>. The cut-off energy is set to 500 eV. The convergence criteria for force and energy are  $0.005 \text{ eV/\AA}$  and  $10^{-8} \text{ eV}$ , respectively. The vacuum layer in the z direction is set to  $15 \text{ \AA}$ , thus avoiding interactions between neighboring layer atoms. The d orbitals of Ta and Pd atoms are treated using the PBE+ $U_{\text{eff}}$  method<sup>[7]</sup>, with the Hubbard  $U_{\text{eff}}$  parameter set to 4 eV<sup>[8]</sup>. Phonon spectrum is calculated using a  $3 \times 3 \times 1$  supercell and the PHONOPY package<sup>[9, 10]</sup>. Ab initio molecular dynamics simulations are performed under the NVT ensemble at 300 K<sup>[11]</sup>. The data for the calculations are processed using the VASPKIT package<sup>[12]</sup>. A maximized localization function is created using the WANNIER90 package<sup>[13]</sup>. The Berry curvature, anomalous Hall conductivity, and chiral edge state are calculated using the WannierTools package<sup>[14]</sup>. The  $T_C$  is calculated through Monte Carlo (MC) simulations, and MC simulations are performed using a  $32 \times 32 \times 1$  supercell and  $1 \times 10^7$  steps at each temperature.

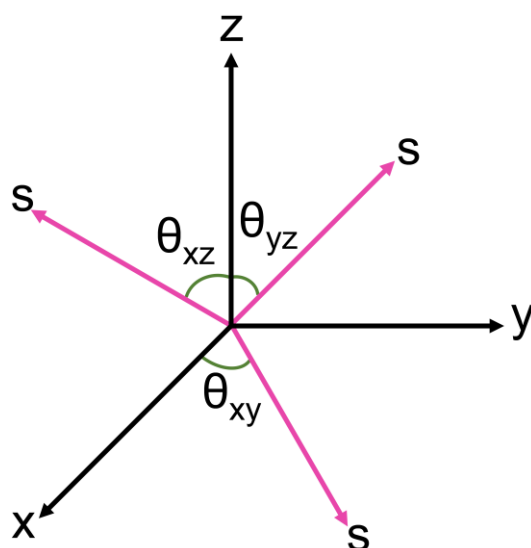

**Fig. S1.** The Schematic diagram shows the spin vector  $S$  rotating at an angle  $\theta$  from 0 to  $180^\circ$  in  $xy$ ,  $xz$ , and  $yz$  planes.

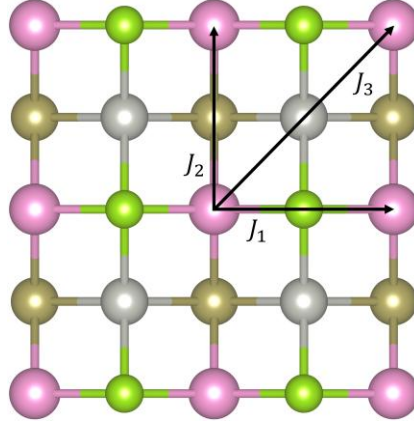

**Fig. S2.** Schematic diagram of the three exchange parameters ( $J_1$ ,  $J_2$ , and  $J_3$ ) for TaPdSTe (TaPdSeTe) monolayer.

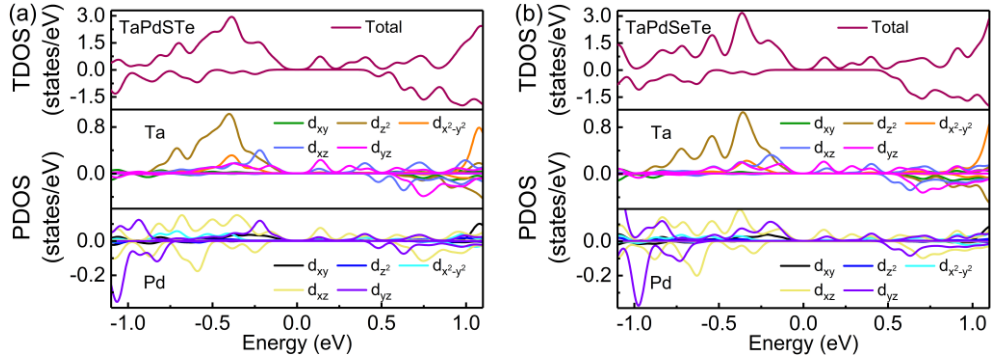

**Fig. S3.** Total density of states (TDOS) and projected density of states (PDOS) for the Ta and Pd atoms of (a) TaPdSTe and (b) TaPdSeTe monolayers.

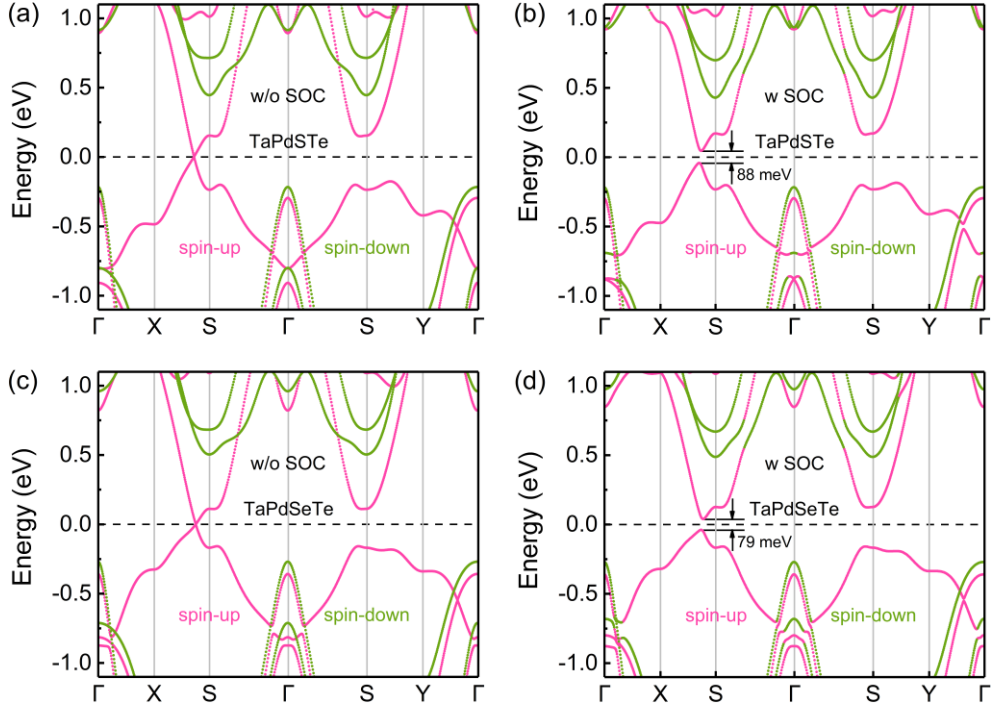

**Fig. S4.** The spin-resolved energy bands for TaPdSTe monolayer (a) without SOC and (b) with SOC effect. The spin-resolved energy bands for TaPdSeTe monolayer (c) without SOC and (d) with SOC effect.

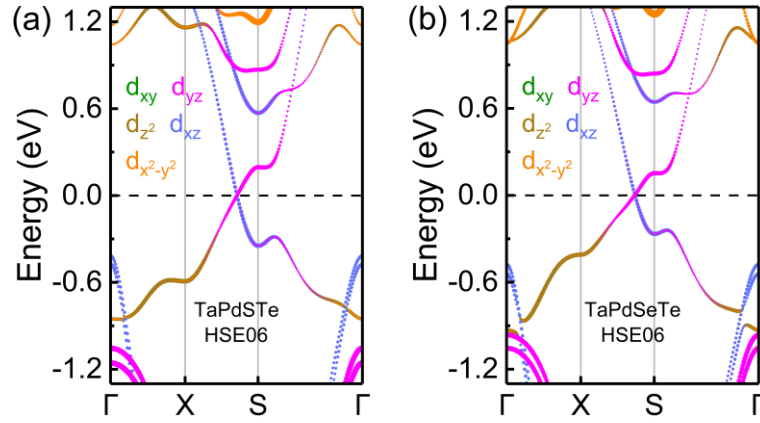

**Fig. S5.** (a) Orbit-resolved energy bands for TaPdSTe monolayer without considering SOC effect from HSE06 method. (b) Orbit-resolved energy bands for TaPdSeTe monolayer without considering SOC effect from HSE06 method.

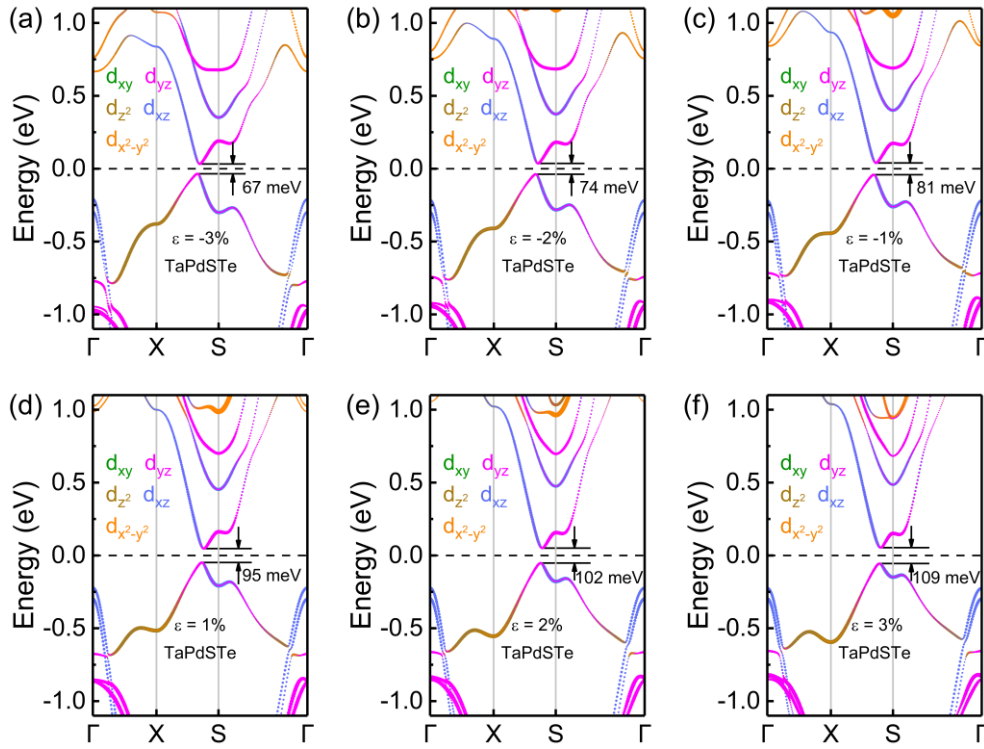

**Fig. S6.** Orbit-resolved energy bands for TaPdSTe monolayer with SOC effect under (a) -3%, (b) -2%, (c) -1%, (d) 1%, (e) 2%, and (f) 3% strains.

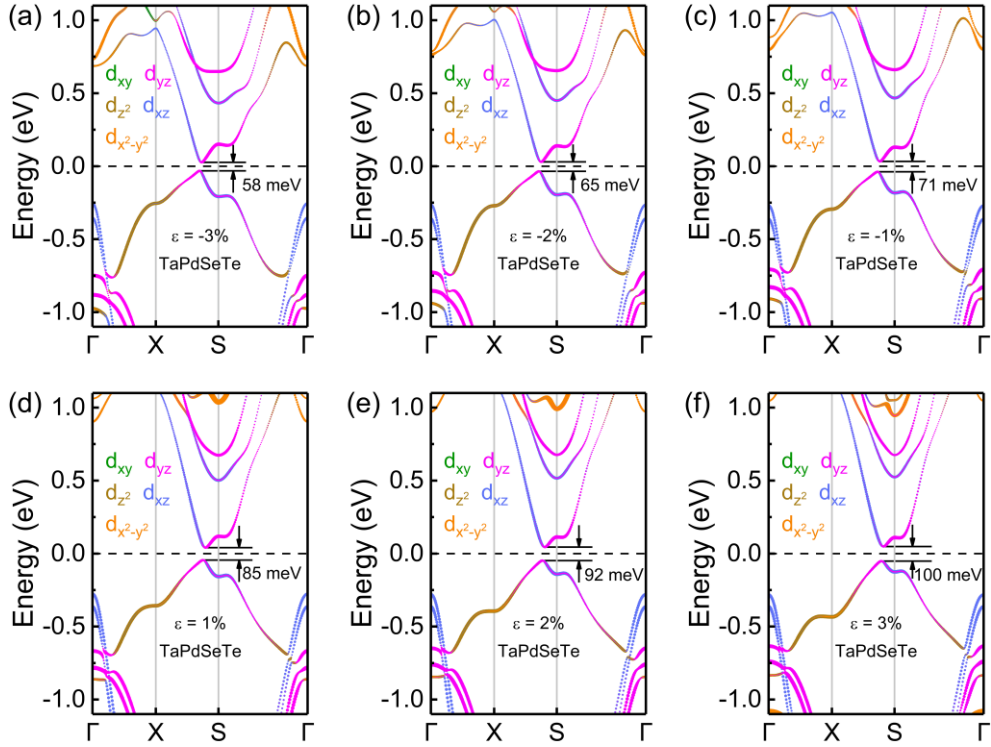

**Fig. S7.** Orbit-resolved energy bands for TaPdSeTe monolayer with SOC effect under (a) -3%, (b) -2%, (c) -1%, (d) 1%, (e) 2%, and (f) 3% strains.

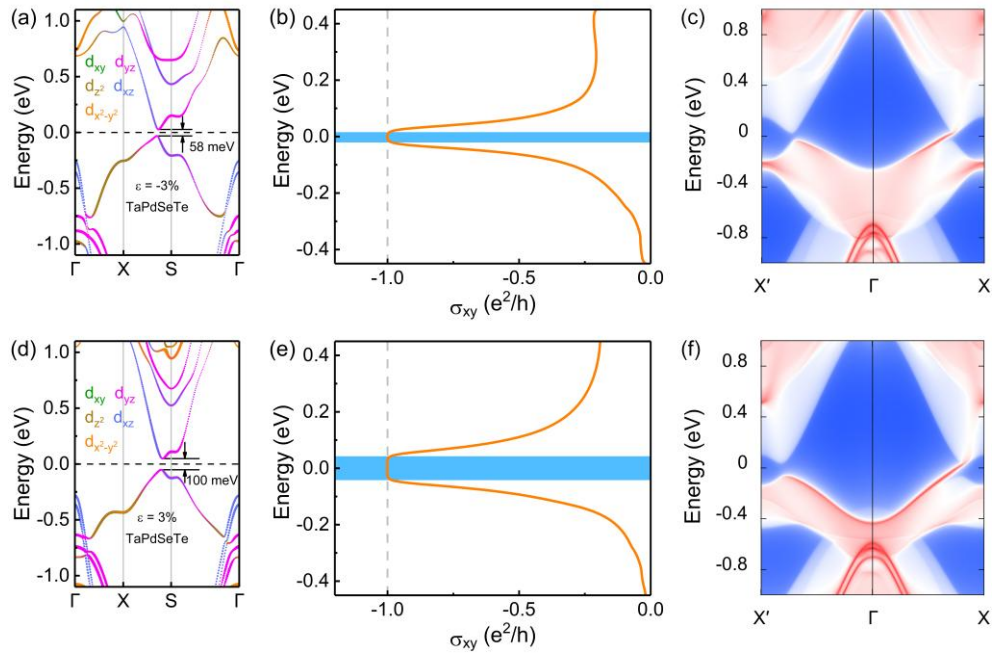

**Fig. S8.** (a) Orbit-resolved energy bands with SOC effect, (b) AHC, and (c) chiral edge state for TaPdSeTe monolayer under -3% strain. (d) Orbit-resolved energy bands with SOC effect, (e) AHC, and (f) chiral edge state for TaPdSeTe monolayer under 3% strain.

## References

- [1] Kresse, G.; Furthmüller, J. Efficiency of ab-initio total energy calculations for metals and semiconductors using a plane-wave basis set. *Computational Materials Science*, 1996, 6, 15-50.
- [2] Kresse, G.; Furthmüller, J. Efficient iterative schemes for ab initio total-energy calculations using a plane-wave basis set. *Physical Review B*, 1996, 54, 11169-11186.
- [3] Blöchl, P. E. Projector augmented-wave method. *Physical Review B*, 1994, 50, 17953-17979.
- [4] Kresse, G.; Joubert, D. From Ultrasoft pseudopotentials to the projector augmented-wave method. *Physical Review B*, 1999, 59, 1758-1775.
- [5] Perdew, J. P.; Burke, K.; Ernzerhof, M. Generalized gradient approximation made simple. *Physical Review Letters*, 1996, 77, 3865-3868.
- [6] Monkhorst, H. J.; Pack, J. D. Special points for Brillouin-zone integrations. *Physical Review B*, 1976, 13, 5188-5192.
- [7] Aryasetiawan, F.; Karlsson, K.; Jepsen, O.; Schönberger, U. Calculations of Hubbard U from first-principles. *Physical Review B*, 2006, 74, 125106.
- [8] He, S.; Kang, R.; Zhou, P.; Lyu, P.; Sun, L. Excellent intrinsic Chern insulators: monolayer PdTaX<sub>2</sub> (X = Se, Te). *Journal of Materials Chemistry C*, 2024, 12, 4062-4069.
- [9] Baroni, S.; de Gironcoli, S.; Dal Corso, A.; Giannozzi, P. Phonons and related crystal properties from density-functional perturbation Theory. *Reviews of Modern Physics*, 2001, 73, 515-562.
- [10] Togo, A.; Tanaka, I. First principles phonon calculations in materials science. *Scripta Materialia*, 2015, 108, 1-5.
- [11] Martyna, G. J.; Klein, M. L.; Tuckerman, M. Nosé-Hoover chains: The canonical ensemble via continuous dynamics. *The Journal of Chemical Physics*, 1992, 97, 2635-2643.
- [12] Wang, V.; Xu, N.; Liu, J.-C.; Tang, G.; Geng, W.-T. VASPKIT: a user-friendly interface facilitating high-throughput computing and analysis using VASP code. *Computer Physics Communications*, 2021, 267, 108033.
- [13] Mostofi, A. A.; Yates, J. R.; Lee, Y.-S.; Souza, I.; Vanderbilt, D.; Marzari, N. wannier90: a tool for obtaining maximally-localised wannier functions. *Computer Physics Communications*, 2008, 178, 685-699.
- [14] Wu, Q.; Zhang, S.; Song, H.-F.; Troyer, M.; Soluyanov, A. A. WannierTools: an open-source software package for novel topological materials. *Computer Physics Communications*, 2018, 224, 405-416.
